# Supplementary material
Source: Springer Nature journal article supplement (https://www.springermedizin.de/resource/supplementary/13032_2014_79_MOESM3_ESM.pdf/9651612)

# professional experience - physician

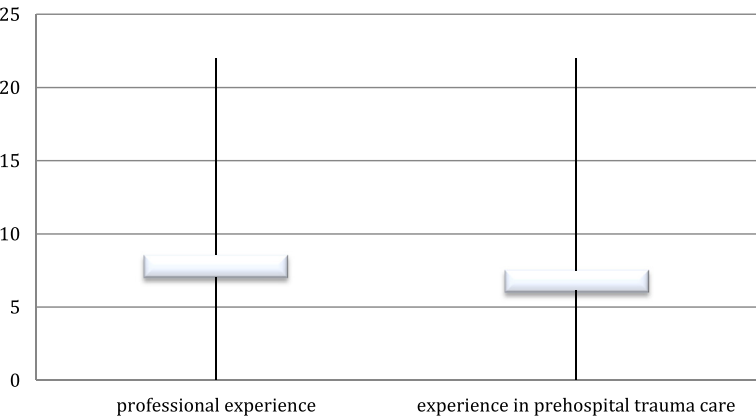

# professional experience - paramedics

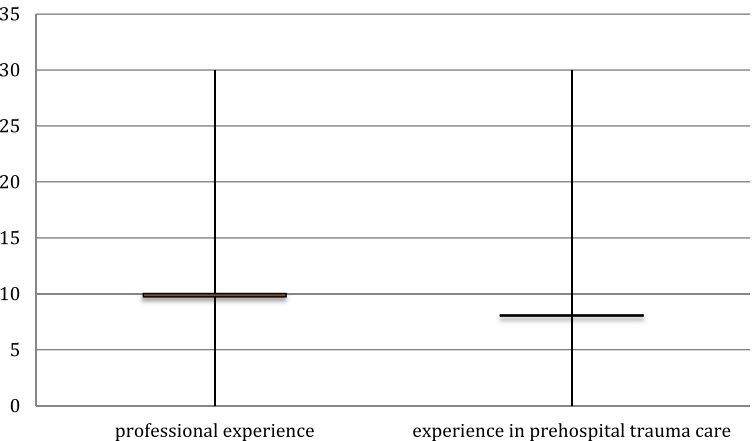

Supplement: MOESM3 [file 9651612]
